# Supplementary material
Source: PubMed Central journal article supplement (PMC5690581)

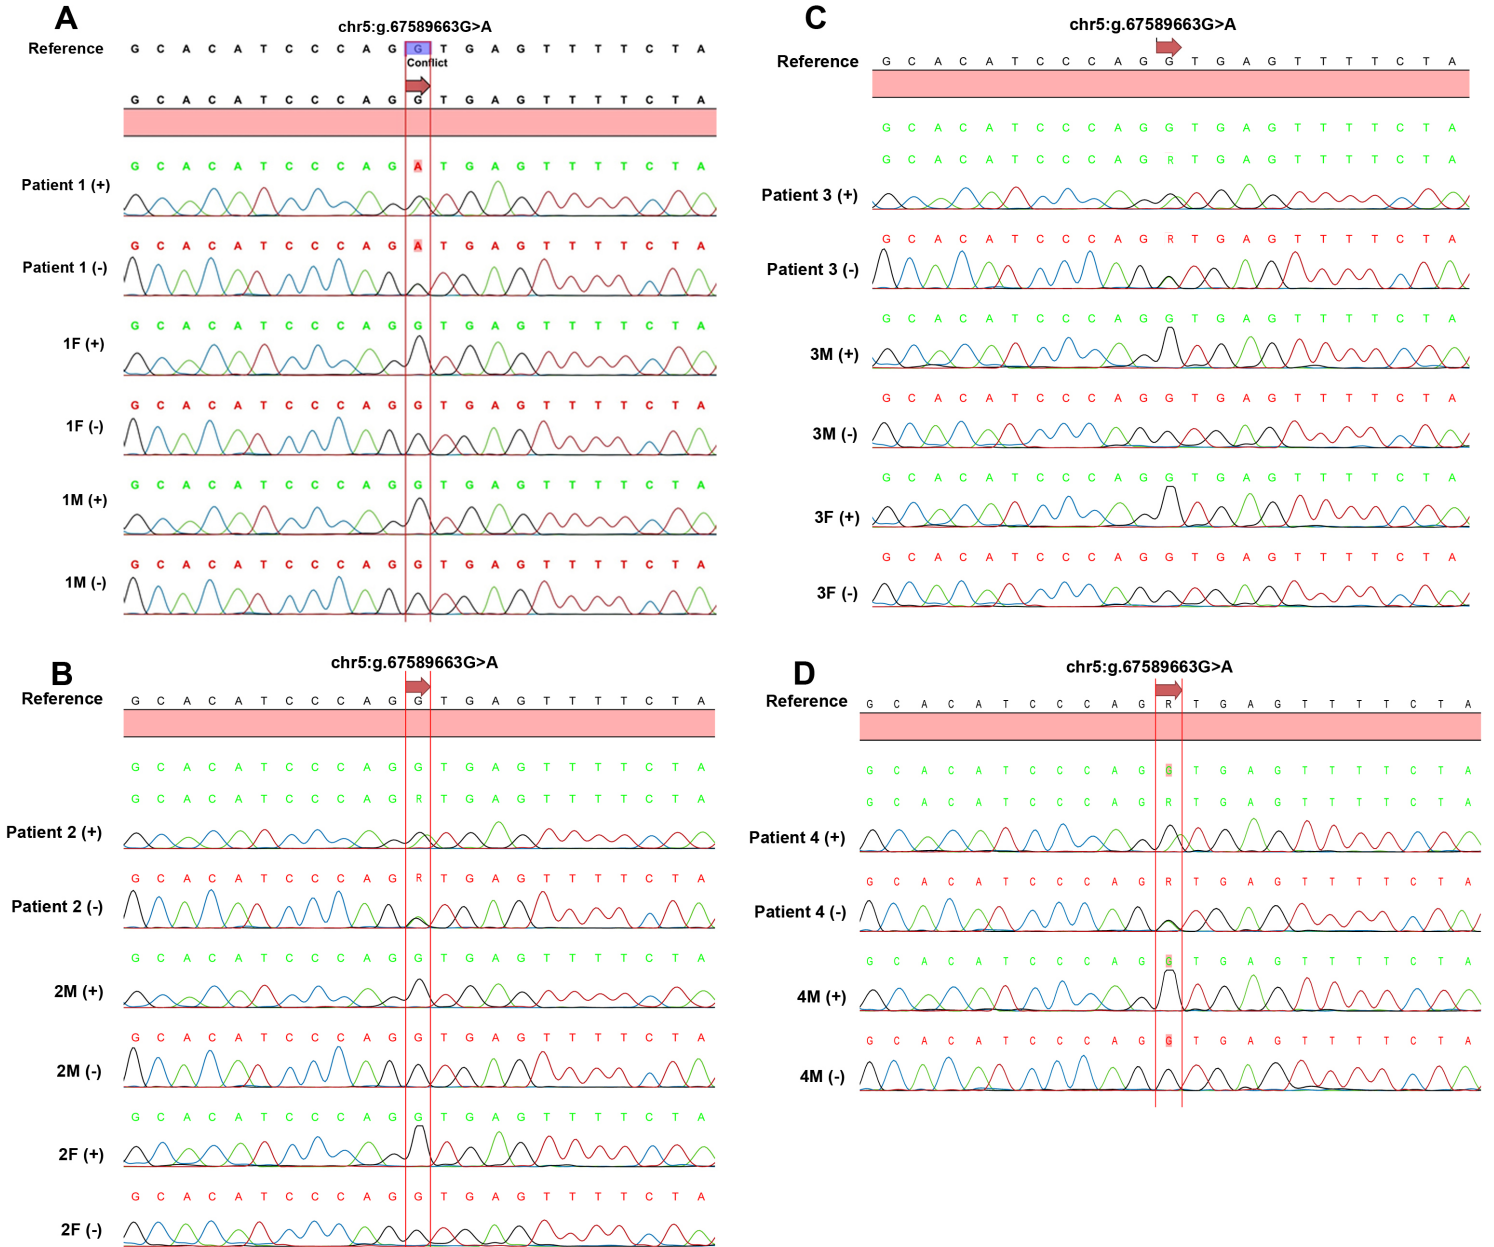

Supplement: NIHMS915517-supplement-ESM_1Figure_S1.pdf [file NIHMS915517-supplement-ESM_1Figure_S1.pdf]
